# Supplementary material for: Green Concrete for a Circular Economy: A Review on Sustainability, Durability, and Structural Properties
Source: Materials (Basel). 2021 Jan 12;14(2):351. doi: 10.3390/ma14020351 (PMC7828242; doi:10.3390/ma14020351)
Supplement: Supplementary file 1 [file materials-14-00351-s001.xlsx]

## Sheet: Table S1 (GGBFS concrete)
Source	Paper title	Journal Name	Specimen	% of GGBFS	Cement	W/b	SP Kg/m3	Compressive Strength,						Flexural Strength,		Split tensile strength,
			ID		Kg/m3			(Mpa)						(Mpa)		(Mpa)
		Cement and Concrete Research						7 Days	14 Days	28 Days	56 Days	90 Days	365 Days	28 Days	90 Days	28 Days	90 Days
(Yun and Kyum, 2005)	An experimental study on corrosion resistance of concrete with ground granulate blast-furnace slag		B1-Control	0	385	0.42	1.7	40.22		40.7	45.1	45.5	-	-	-	-	-
			B2	25	289		1.2	37.7		44.1	46.1	51.5
			B3	40	231		1.7	30.4		39.2	44.1	57.9
			B4	55	173		1.2	25.5		39.2	45.1	55.9
(Khatib and Hibbert, 2005)	Selected engineering properties of concrete incorporating slag and metakaolin	Construction and Building Materials	M1-Control	0	325	0.5	-	31		39.5	43	51	-	-	4.85	-	-
			M2	40	194			25		34	44.8	60			3.95
			M3	60	129			23.5		36	45	61			5.8
			M4	80	64			19		25.5	28	31			2.7
(Cheng et al., 2005)	Influence of GGBS on durability and corrosion behavior of reinforced concrete	Materials Chemistry and Physics	Mix A-Control	0	427	0.55	-		32.5	40	42	42	-	-	-	-	-
			Mix B	40	256				25	40.3	45	45
			Mix C	60	171				28	37.3	48	48
(Oner and Akyuz, 2007)	An experimental study on optimum usage of GGBS for the compressive strength of concrete	Cement & Concrete Composites	C250GGBS00.0	0	250	0.88	-	15.3	17.6	22.7	-	-	25.9	-	-	-	-
			C175GGBS00.0	0	175	1.19		9.2	9.7	13			14.5
			C175GGBS37.5	15	175	1.01		12.7	13.4	18.1			21.4
			C175GGBS75.0	30	175	0.87		16.4	17.4	23.5			30.5
			C175GGBS125.0	50	175	0.74		18.6	20.2	27			38.4
			C175GGBS175.0	70	175	0.66		19.1	20.6	27.8			40.8
			C175GGBS225.0	90	175	0.6		18.5	20.1	27.2			40.9
			C175GGBS275.0	110	175	0.55		17.1	18.5	25.1			38.7
			C300GGBS00	0	300	0.75		19.9	22.7	28.9			33.1
			C210GGBS00.0	0	210	1.02		12.4	13.7	17.5			19.8
			C210GGBS45.0	15	210	0.86		16.7	18.3	23.6			28.9
			C210GGBS90.0	30	210	0.75		21.2	23.1	30			39.1
			C210GGBS150.0	50	210	0.64		23.9	26.1	34			47.9
			C210GGBS210.0	70	210	0.57		24.4	26.6	34.9			50.5
			C210GGBS270.0	90	210	0.52		24.1	26.3	34.5			50.7
			C210GGBS330.0	110	210	0.48		22.2	24.3	31.8			47.9
			C350GGBS00	0	350	0.66		24.9	27.8	35			40
			C245GGBS00.0	0	245	0.89		16.1	17.9	22.6			25.6
			C245GGBS52.5	15	245	0.76		20.8	22.9	29			36.2
			C245GGBS105.0	30	245	0.66		25.6	28.3	36.1			46.9
			C245GGBS175.0	50	245	0.57		29.6	32.4	41.4			57.4
			C245GGBS245.0	70	245	0.51		30.1	33	42.3			59.7
			C245GGBS315.0	90	245	0.47		29.5	32.4	41.5			60.2
			C245GGBS385.0	110	245	0.44		26.6	29.2	37.5			55.2
			C400GGBS00	0	400	0.6		29.1	32.6	40.4			46.3
			C280GGBS00.0	0	280	0.8		19.6	21.9	27.5			31.2
			C280GGBS60.0	15	280	0.68		24	26.7	33.7			41.1
			C280GGBS120	30	280	0.59		29.8	33.1	41.8			53.8
			C280GGBS200	50	280	0.51		33.8	37.5	47.5			64.5
			C280GGBS280	70	280	0.47		34.4	38.1	48.4			66.7
			C280GGBS360	90	280	0.43		33.3	37	47			67.2
			C280GGBS440	110	280	0.41		30.2	33.5	42.7			62.4
(Guneyisi and Gesoglu, 2008)	A study on durability properties of high-performance concretes incorporating high replacement levels of slag	Materials and Structures	Control	0	400	0.4	6.8	-	-	56.2	-	63.1	-	-	-	4.41	5.09
			50% slag	50	200					49		66.2				3.93	5.2
			60% slag	60	160					43.1		64.5				3.69	5.17
			70% slag	70	120					37.1		57.8				3.39	5
			80% slag	80	80					34.2		51.4				3.05	4.57
(Bilim et al., 2009)	Advances in Engineering Software Predicting the compressive strength of ground granulated blast furnace slag concrete using artificial neural network	Advances in Engineering Software	350-0.3-00	0	350	0.3	12.25	69.4		75.8		83.9
			350-0.3-20	20	280		11.55	68.3		81.4		86.8
			350-0.3-40	40	210		8.75	64.2		81		87.8
			350-0.3-60	60	140		7	57.3		73.3		81.2
			350-0.3-80	80	70		5.6	45.8		62.7		70.6
			350-0.4-00	0	350	0.4	5.25	54.8		63.9		71.3
			350-0.4-20	20	280		4.2	50.9		65.8		73.7
			350-0.4-40	40	210		3.5	49.1		67.2		76.3
			350-0.4-60	60	140		1.75	46.9		61.8		74
			350-0.4-80	80	70		2.8	37.3		50.4		58.9
			350-0.5-00	0	350	0.5	0.7	44.5		53.6		61.5
			350-0.5-20	20	280		-	41.2		57		65.4
			350-0.5-40	40	210			36.9		55.9		65.9
			350-0.5-60	60	140			28.7		45.1		58.3
			350-0.5-80	80	70			21.8		29.9		38.1
			400-0.3-00	0	400	0.3	16	73.8		80.7		85.2
			400-0.3-20	20	320		14	69		81.4		90.1
			400-0.3-40	40	240		9.6	64.5		82		88.3
			400-0.3-60	60	160		6	58.3		77.8		79
			400-0.3-80	80	80		4.8	48.5		67.7		76.2
			400-0.4-00	0	400	0.4	6	53.7		63.9		67.9
			400-0.4-20	20	320		4	51.5		66		72.4
			400-0.4-40	40	240		4	50.6		66.9		77.9
			400-0.4-60	60	160		2.4	45.6		61.1		75.1
			400-0.4-80	80	80		3.6	38.6		53.1		56.8
			400-0.5-00	0	400	0.5	0.4	34.9		51.4		56.8
			400-0.5-20	20	320		-	34.2		52.6		61.4
			400-0.5-40	40	240			28.6		51.6		57.9
			400-0.5-60	60	160			23.8		40.1		49.6
			400-0.5-80	80	80			18.7		25.3		31.6
			450-0.3-00	0	450	0.3	18	75.7		80.3		85.7
			450-0.3-20	20	360		14.4	72.1		81.8		90.1
			450-0.3-40	40	270		11.7	66.4		83.8		91.4
			450-0.3-60	60	180		9	63.2		80.6		92.5
			450-0.3-80	80	90		8.1	50.2		66.3		77.4
			450-0.4-00	0	450	0.4	4.5	59.2		64.3		71
			450-0.4-20	20	360		3.6	60.3		73.5		82.3
			450-0.4-40	40	270		2.25	56.3		66.4		81
			450-0.4-60	60	180		2.25	38.6		61.8		73.4
			450-0.4-80	80	90		1.35	36.7		46.8		54.6
			450-0.5-00	0	450	0.5	-	36.6		48.7		50.5
			450-0.5-20	20	360			33.2		50.4		56.2
			450-0.5-40	40	270			28.3		49.3		53.4
			450-0.5-60	60	180			20.8		39.5		49.1
			450-0.5-80	80	90			17.5		27.7		35
(Ozbay and Lachemi, 2011)	Compressive strength , abrasion resistance and energy absorption capacity of rubberized concretes with and without slag	Materials and structures	Control	0	450	0.4	6.743	-	-	62.8	-	-	-	-	-	-	-
			0R20S	20	360		6			67.5
			0R40S	40	270		4.571			70.5
(Johari et al., 2011)	Influence of supplementary cementitious materials on engineering properties of high strength concrete	Construction and Building Materials	Control	0	450	0.28	14	74.8	-	86.7	-	95.6	105.7	-	-	-	-
			GGBS20	20	360			79.6		95.3		103.8	111.2
			GGBS40	40	270			73.9		87.6		99	104.6
			GGBS60	60	180			57.6		86.7		97.7	102.5
(Jang, Karthick and Kwon, 2017)	Investigation on Durability Performance in Early Aged High-Performance Concrete Containing GGBFS and FA	Advances in Materials Science and Engineering	O100	0	454	0.37	-			45.5
				0	400	0.42				39
				0	357	0.47				32.5
			O70S30	30	318	0.37				47.8
				30	280	0.42				42.2
				30	250	0.47				38
			O50S50	50	227	0.37				50
				50	200	0.42				45
				50	179	0.47				40
(Khan et al., 2018)	Fresh and Hardened Properties of Ground Granulated Blast Furnace Slag Made Concrete	International Journal of Modern Research in Engineering & Management	CM	0	100	0.54	-	25.09		29.69		30.29
			G5%	5	95			22.75		29.75		30.55
			G10%	10	90			21.85		29.85		30.99
			G15%	15	85			21.45		30.25		31.45
			G20%	20	80			20.95		30.95		32
(Song et al., 2019)	Effect of carbon fi ber on mechanical properties and dimensional stability of concrete incorporated with granulated-blast furnace slag	Journal of cleaner production	CM-Control	0	510	0.3	8.3			59.4
			GGBS1	10	459					56.97
			GGBS2	20	408					53.76
(Chen et al., 2019)	Evaluating engineering properties and environmental impact of pervious concrete with fl y ash and slag	Journal of cleaner production	PC-Regular	0	368	0.27		10.8		13.5				2.5
			PC-BFS	25	276	0.36		6.8		9.2				1.5

## Sheet: Table S2 (FA concrete)
Source	Paper title	Journal name	Specimen	% of Fly ash	Cement	W/b	SP Kg/m3	Compressive Strength,					Flexural Strength,			Split tensile strength,
			ID		Kg/m3			(Mpa)					(Mpa)			(Mpa)
								7 Days	28 Days	56 Days	90 Days	365 Days	7 Days	28 Days	90 Days	7 Days	28 Days	56 Days
(Naik et al., 1994)	PERMEABILITY OF CONCRETE CONTAINING LARGE AMOUNTS OF FLY ASH	Cement and Concrete Research	C-3-Control	0	374.95	0.36	2.2	-	43.5	-	47	-	-	-	-	-	-	-
			P4-7	50	180.95	0.33	2.03		31.5		40
			P4-8	70	106.79	0.37	1.98		20		35
(Lam, Wong and POON, 1998)	EFFECT OF FLY ASH AND SILICA FUME ON COMPRESSIVE AND FRACTURE BEHAVIORS OF CONCRETE	Cement and Concrete Research	S1-0-0-Control	0	500	0.3	7.5	75.5	86.8	87.2	95.7						5.27	5.52
			S1-15-0	15	425		7.5	66.4	86	94.8	99.6						5.45	5.91
			S1-25-0	25	375		9.25	65.7	85.4	90.4	95.4						5.23	5.75
			S1-45-0	45	275		10.5	49.2	71.8	85.4	87.7						4.51	5.23
			S1-55-0	55	225		13	36.4	57.4	66.6	72.8						3.13	4.55
			S2-0-0-Control	0	400	0.4	4	48.4	60.7	67.1	70.5						3.93	3.94
			S2-15-0	15	340		4.4	39.9	56	63.4	68.5						3.75	4.58
			S2-25-0	25	300		4.8	33.7	49.3	60.8	66.2						3.91	4.37
			S2-45-0	45	220		5.2	20.3	43.9	54.1	61.2						2.91	3.51
			S2-55-0	55	180		6.4	19.8	37.3	47.1	52.9						2.97	3.43
			S3-0-0-Control	0	410	0.5	-	36.9	50.8	57.1	58.1						3.66	4.02
			S3-15-0	15	348.5			32.3	48.9	55.7	62.6						3.53	3.92
			S3-25-0	25	307.5			26.2	41.7	49.1	53.7						3.09	3.26
			S3-45-0	45	225.5			18.4	35.6	47	54.1						2.79	3.16
			S3-55-0	55	184.5			11.3	24	33.7	41.4						2.32	3.16
(Poon, Lam and Wong, 2000)	A study on high strength concrete prepared with large volumes of low calcium fly ash	Cement and Concrete Research	Control	0	637	0.24	18.4	79.5	97.4		110.2
			25%FA	25	475		18.3	74.6	105.9		124.5
			45%FA	45	347		23.7	56.3	89.4		107.2
			Control	0	702	0.19	35.1	83.5	96.8		114.5
			25%FA	25	512		34.7	66.8	102.3		123.6
			45%FA	45	372		33.8	41.7	88.5		109.2
(Bouzoubaa and Lachemi, 2001)	Self-compacting concrete incorporating high volumes of class F fly ash Preliminary results	Cement and Concrete Research	1-Control	0	336	0.5	0	27.3	34.6	-	-	-	-	-	-	-	-	-
			2	40	247	0.45	1.2	21.2	34.6
			3	40	238	0.4	2.9	25.8	37.8
			4	40	232	0.35	3.8	31.3	48.3
			5	50	207	0.45	0.4	17.4	33.2
			6	50	200	0.4	1.7	19.3	34.9
			7	50	197	0.35	2.8	22.9	38.9
			8	60	169	0.45	0	15.6	30.2
			9	60	163	0.4	2	14.7	26.2
			10	60	161	0.35	3	20.6	35.8
(Atis, 2003)	High-Volume Fly Ash Concrete with High Strength and Low Drying Shrinkage	Journal of materials in civil engineering	M1	0	400	0.34	5.6	49.27	60.75	-	65.03	71	-	-	-	2.55	3.1	-
			M2	0	400	0.32	0	52.63	64.95		68.1	77.08				2.96	3.48
			M3	70	120	0.28	5.6	24.01	33.25		40.75	45				2.07	2.53
			M4	70	120	0.29	0	18.6	30.55		41.1	48.05				1.81	2.51
			M5	50	200	0.33	5.6	38	57		60.2	67.6				2.99	4.06
			M6	50	200	0.3	0	48.3	66.55		79.9	83.6				3.32	4.2
(Han, Kim and Park, 2003)	Prediction of compressive strength of fly ash concrete by new apparent activation energy function	Cement and Concrete Research	WC60-0	0	330	0.6	-	23.6	32.9	-	38.6	42.5	-	-	-	-	-	-
			WC60-10	10	297			21.8	33.8		40.3	47.6
			WC60-20	20	264			18	28		37.2	44.8
			WC60-30	30	231			13.5	25		36	43.2
			WC55-0	0	350	0.55		26.6	36.1		40.2	46.5
			WC55-10	10	315			25.4	38.3		45.8	51.8
			WC55-20	20	280			22.6	33.8		43.5	52.1
			WC55-30	30	254			18.3	30.9		39.3	48.2
			WC40-0	0	420	0.4	1.2	43.6	49.7		56.3	61.9
			WC40-10	10	378		1.2	42.1	50.3		57.5	66.5
			WC40-20	20	336		1.5	38	48		56.5	65.4
			WC40-30	30	294		1.7	33.7	42.8		53.5	61.3
			WC35-0	0	480	0.35	1.5	49.1	56.3		59.7	68.8
			WC35-10	10	432		1.5	50.2	55.7		64.3	74.8
			WC35-20	20	384		1.5	44.9	56		61.3	75.3
			WC35-30	30	336		1.8	39.1	51.8		59.5	73.9
			WC32-0	0	520	0.32	1.8	52.2	62.1		63.3	71.4
			WC32-10	10	468		1.8	51.9	61.7		65.3	77.6
			WC32-20	20	416		2	46.6	58.6		66.1	78.9
			WC32-30	30	364		2.3	36.5	44.2		57.7	72.8
			WC27-0	0	600	0.27	2	61.2	71.8		73.8	83.4
			WC27-10	10	540		2	56.6	67.7		75.4	87.4
			WC27-20	20	480		2.3	50.5	65		72.8	85.2
			WC27-30	30	420		3	40	51.9		60.4	78.6
(Siddique, 2004)	Performance characteristics of high-volume Class F fly ash concrete	Cement and Concrete Research	M-1-Control	0	400	0.41	2.2	25.7	37.2	-	39.5	42.1	3.8	5.4	5.5	2.8	4.1
			M-2	40	240	0.4	2.5	17	26.7		33.5	38.6	2.3	3.6	4.5	1.8	3
			M-3	45	220	0.41	2.6	15.3	24.7		30.1	34.4	2	3.1	3.9	1.6	2.6
			M-4	50	200	0.4	2.7	14.7	23.1		27.7	32.1	1.8	2.7	3.1	1.5	2.2
(Dinakar, Babu and Santhanam, 2008)	Cement & Concrete Composites Durability properties of high volume fly ash self compacting concretes	Cement and Concrete Composites	NC20	0	234	0.79	0	-	29	-	35.6	-	-	-	-	-	-	-
			SCC558	85	83	0.41	2		14.64		22.07
			NC30	0	319	0.58	0		43		44.5
			SCC557	70	165	0.34	2		34.9		45.52
			SCC757	70	225	0.33	2		34.83		44.96
			NC60	0	500	0.37	0		74		76
			SCC555	50	275	0.34	2.5		57.9		66.72
			SCC655	50	325	0.34	2		50.07		60.63
			NC90	0	552	0.29	1		78		80
			SCC553	30	385	0.31	2.5		77.08		91.95
			SCC530	30	350	0.36	1.75		71.62		75.26
			NC100	0	659	0.22	1		87		86
			SCC551	10	495	0.29	3		86.41		90.75
(Nath and Sarker, 2011)	Effect of Fly Ash on the Durability Properties of High Strength Concrete	Procedia Engineering	A-00-Control	0	355	0.41	5.11	59	68	75	76	-	-	-	-	-	-	-
			A-30	30	308	0.32	4.77	59	68	90	91
			A-40	40	264	0.31	4.75	50	67	88	88
			B-00-Control	0	517	0.29	6.77	70	85	97	100
			B-30	30	362		4.8	59	72	92	96
			B040	40	311		4.24	51	67	88	89
(Durán-herrera et al., 2011)	Evaluation of sustainable high-volume fly ash concretes	Cement & Concrete Composites	A-0-Control	0	425	0.5	2.2	35.1	43.5	44.9	-	-	-	-	-	-	-	-
			A-15	15	361			27.6	36.8	40.1
			A-30	30	298			24.1	32.5	35.5
			A-45	45	234			18.6	23.8	26.8
			A-60	60	170			10.1	16.8	17.2
			A-75	75	106			4.1	7	9.9
			B-0-Control	0	405	0.55	1.3	30.4	37	38.4
			B-15	15	344			27.9	32.4	35.7
			B-30	30	284			20.7	25.4	27
			B-45	45	223			12.9	19.6	21.5
			B-60	60	162			7.8	13.1	14
			B-75	75	101			3.4	6	7.9
			C-0-Control	0	370	0.6	0.6	26.3	32.1	34.5
			C-15	15	315			19.8	27.5	29.3
			C-30	30	259			16.7	21.3	24.5
			C-45	45	204			9.1	13.4	16.6
			C-60	60	148			6.7	9.8	12.6
			C-75	75	93			2.6	5	6.7
(Kayali and Ahmed, 2013)	Assessment of high volume replacement fly ash concrete – Concept of performance index	Construction and Building Materials	Control	0	450	0.38	1.14	-	-	-	-	78	-	-	-	-	-	-
			F25	25	337.5		1					59
			F50	50	225		0.6					49
			F70	70	135		0.8					15
(Huang et al., 2013)	Mix proportions and mechanical properties of concrete containing very high-volume of Class F fly ash	Construction and Building Materials	L24F00	0	280	0.72	0	20.9	25	27.6	29	36.5
			L24F20	20	224	0.66	0.5	18.9	25.4	28.5	32.1	43.2
			L24F40	40	168	0.56	2.1	16.8	25.6	30	35.2	39.4
			L24F60	60	112	0.44	3.9	14.5	23.5	25.6	30.6	41.2
			L24F80	80	112	0.27	3.7	14.1	20.9	24.3	28.5	38.7
			L35F00	0	340	0.6	0.4	27.2	34.5	37.2	40.3	44.6	4.9	5.1	5.9	-	-	-
			L35F20	20	272	0.55	0.8	23.9	36.5	40.8	45.8	54.7	4.7	5.3	6.5
			L35F40	40	204	0.48	1.7	24.7	40.3	42.5	51.3	62.4	4.5	5.2	6.6
			L35F60	60	136	0.36	3.3	18.9	34.5	38.8	47.8	65.3	3.9	5	6.3
			L35F80	80	136	0.24	4.9	16.5	30	34.4	40.4	61.6	3.3	3.7	5.8
			H35F00	0	340	0.6	0.4	27.2	34.5	37.2	40.3	44.6	4.9	5.1	5.9
			H35F20	20	272	0.55	1.5	22.4	34.9	36.1	39.6	46.2	4.5	5	6.1
			H35F40	40	204	0.48	2.7	21.5	34.1	37.4	40.8	54.3	4.1	5.1	6.3
			H35F60	60	136	0.36	5	17.8	30.5	33.9	39	55.8	3	4.5	5.9
			H35F80	80	136	0.26	8.7	11.6	25.2	28.3	34.1	43.4	2.2	3.2	5.3
(Rivera et al., 2015)	Massive volume fl y-ash concrete : A more sustainable material with fl y ash replacing cement and aggregates	Cement & Concrete Composites	Control	0	1307.5	0.42	-	46	70	-	80	-	-	-	-	-	-	-
			40-C	40	865.7			26	51		68
			60-C	60	595.4			19.5	43		61
			80-C	80	307.4			6	31		58
			40-F	40	864.4			40	78		82.5
			60-F	60	594			20	51		58
			80-F	80	306.4			6	22		35
(Çelik and Özturan, 2017)	Green Concrete Produced by Fly Ash and Silica Fume	INTERNATIONAL JOURNAL of ENGINEERING SCIENCE AND APPLICATION	100/0/0	0	452.1	0.35	7.95	52.9	71.3	-	-	73.6	-	-	-	-	-	-
			85/0/15	15	384.1	0.35	7.91	53.3	72.4			76.1
			100/0/0	0	354.2	0.5	3.72	34	43.4			56.5
			85/0/15	15	300.9	0.5	4.96	28.4	44.6			49.7
			100/0/0	0	310	0.7	0	13.6	20.9			24.8
			85/0/15	15	263.5	0.7	0	10.3	21.1			26.4
(Saha, 2018)	Effect of class F fl y ash on the durability properties of concrete	Sustainable Environment Research	FA0-Control	0	400	0.35	4	45.5	57.4	62	-	62.5	-	-	-	-	-	-
			FA10	10	360			39.2	39	51.5		54.5
			FA20	20	320			33.8	33	45		51.5
			FA30	30	280			29.8	29	43.5		54.5
			FA40	40	240			24.6	24	35.5		49.5

## Sheet: Table S3 (SF concrete)
Source	Paper title	Journal Name	Specimen	% of Silica fume	Cement	W/b	SP Kg/m3	Compressive Strength,										Flexural Strength,		Split tensile strength,
			ID		Kg/m3			(Mpa)										(Mpa)		(Mpa)
	CHARACTERISTICS OF SILICA-FUME CONCRETE							3 Days	7 Days	14 Days	28 Days	56 Days	65 Days	90 Days	154 Days	180 Days	365 Days	7 Days	28 Days	7 Days	28 Days
(Khedr and Abou-Zeid, 1995)		Journal of Materials in Civil Engineering	Ia	0	420	0.3	12.6		39.5		61	63		63				-	9.1		-
			Ib	5	399				55.5		71	84		86					10
			Ic	10	378				62		81.5	92		100					9.8
			Id	15	357				63		85	93		101					10.5
			Ie	20	336				46		82.5	103.5		110					11.5
			If	25	315				40		77.5	88		89					11.3
			IIa	0	420	0.57	0		20		28	35		35.5					4
			IIb	5	399				22		30.8	36		36.4					4.3
			IIc	10	378				23.9		36	40.3		40					4.25
			IId	15	357				27		38	42.8		44					4.6
			IIe	20	336				27.3		44	52		54					5
			IIf	25	315				18		35.5	45		46					4.8
(Mazloom, Ramezanianpour and Brooks, 2004)	Effect of silica fume on mechanical properties of high-strength concrete	Cement & Concrete Composites	OPC-Control	0	500	0.35	8.17		46	52	58			64			73
			SF6	6	470		9.78		50.5	58	65			71			73
			SF10	10	450		11.71		52	61	67.5			74			74
			SF15	15	425		13.34		53	63	70			76			75
(Wong and Razak, 2005)	Efficiency of calcined kaolin and silica fume as cement replacement material for strength performance	Cement and Concrete Research	Control	0	500	0.27	9	39	72.5		84	86.5		87.5		90
			SF 5 –0.27	5	475			35	75.5		88.5	93		96.5		97.5
			SF 10–0.27	10	450			25	79		95.5	100		104		107
			SF 15–0.27	15	425			24.5	76.5		101	103.5		106		109
			Control	0	500	0.3	4	48	72		83.5	84.5		85.5		87.5
			SF 5 –0.3	5	475			46	81		91	95.5		95.5		97.5
			SF 10–0.3	10	450			42	78.5		95	97		99		103
			SF 15–0.3	15	425			38	74.5		98.5	101.5		104		106.5
			Control	0	500	0.33	2.5	41	62.5		75	78		79		81.5
			SF 5 –0.33	5	475			35	69.5		83	85		90		90
			SF 10–0.33	10	450			32	70.5		89.5	90.5		92		93.5
			SF 15–0.33	15	425			31	70.5		88.5	93		95.5		100.5
(Bhanja and Sengupta, 2005)	Influence of silica fume on the tensile strength of concrete	Cement and Concrete Research	M1-Control	0	520	0.26	18.2				82								8.9		5.2
			M2	5	494						93								9.8		6.35
			M3	10	468						93								10.35		6.28
			M4	15	442						95								11.9		6.57
			M5	20	416						93.4								11.1		6.5
			M6	25	390						88.3								11		6.65
			M7-Control	0	510	0.3	17.85				67.5								7.5		5.1
			M8	5	484.5						75								9		5.6
			M9	10	459						78								9.5		6.15
			M10	15	433.5						83								9.9		6.22
			M11	20	408						86								10.8		6.2
			M12	25	382.5						82								10.2		5.55
			M13-Control	0	500	0.34	17.5				59.5								7.4		4.5
			M14	5	475						64								8.75		5.6
			M15	10	450						72								8.78		5.65
			M16	15	425						75.5								9.7		5.7
			M17	20	400						79.3								10.8		5.9
			M18	25	375						78.5								8.7		5.75
			M19-Control	0	490	0.38	17.15				54.8								7.1		4.15
			M20	5	465.5						60								7.1		4.5
			M21	10	441						65.5								7.53		5.1
			M22	15	416.5						66								8.9		5.15
			M23	20	392						66.8								9		5.17
			M24	25	367.5						70.8								9.25		5.2
			M25	30	343						66								8		4.9
			M26-Control	0	480	0.42	16.8				48								6.78		3.78
			M27	5	456						51								6.8		4.38
			M28	10	432						56								6.83		4.4
			M29	15	408						60								7.43		4.42
			M30	20	384						61.5								7.5		4.5
			M31	25	360						63								8.25		4.44
			M32	30	336						50								7.73		4.35
(Poon, Kou and Lam, 2006)	Compressive strength , chloride diffusivity and pore structure of high performance metakaolin and silica fume concrete	Construction and Building Materials	Control	0	500	0.3	0.5		81.1		96.5			102.5
			5% SF	5	475		0.6		79.3		106.5			110.2
			10% SF	10	450		0.8		76.9		107.9			115.6
			Control	0	410	0.5			41.2		52.1			60.4
			5% SF	5	390				47		54.3			67.5
			10% SF	10	369				47.4		58.4			69.1
(Behnood and Ziari, 2008)	Effects of silica fume addition and water to cement ratio on the properties of high-strength concrete after exposure to high temperatures	Cement & Concrete Composites	W40OPC	0	430	0.4	1.6		48.3		61.8										-
			W35SF6	6	441	0.35	2.9		61.5		73.9
			W30OPC	0	495	0.3	1.9		55.3		67.4
			W30SF6	6	465	0.3	3.1		69.1		80.3
			W30SF10	10	450	0.3	3.7		74.1		84.2
(Özcan et al., 2009)	Comparison of artificial neural network and fuzzy logic models for prediction of long-term compressive strength of silica fume concrete	Advances in Engineering Software	01–05	0	350	0.3	43.6		55		64.4					69
			06–10	10	315		46.2		64.4		83.5					88.2
			11–15	15	297.5		44.2		60.4		82.7					85.5
			16–20	20	280		41.2		58		85.9					89.3
			21–25	0	350	0.4	41		51.7		59.7					72.7
			26–30	10	315		45.5		62.4		87.8					90
			31–35	15	297.5		47.3		66.1		88.7					93.9
			36–40	20	280		45.4		62.2		87.9					95.5
			41–45	0	350	0.5	32.7		44.1		51.7					61.6
			46–50	10	315		34.3		45.6		61.8					65.6
			51–55	15	297.5		34.7		46.5		63.6					66.5
			56–60	20	280		31.1		45		62.7					63.5
			61–65	0	350	0.6	20.7		28		37.5					45
			66–70	10	315		21.3		31.7		48.5					50.7
			71–75	15	297.5		21.5		32.6		48.8					51
			76–80	20	280		20.9		31.2		46.7					48
			81–85	0	400	0.3	47.1		53.9		65.4					77
			86–90	10	360		56		68.8		86.7					92.1
			91–95	15	340		51.8		65.1		90.5					91.4
			96–100	20	320		49.5		69.8		94					102.6
			101–105	0	400	0.4	45.5		57.7		65.3					75.8
			106–110	10	360		53.3		62		88					91.7
			111–115	15	340		49		64.6		81.5					85.3
			116–120	20	320		44.9		61		80.3					82.9
			121–125	0	400	0.5	33.4		41.1		50					58.3
			126–130	10	360		34.3		43.9		62.3					62.5
			131–135	15	340		31.3		44.1		60.6					63.8
			136–140	20	320		28.1		42.3		58					60.5
			141–145	0	400	0.6	24		31.5		41.6					45.7
			146–150	10	360		20.6		30.9		44.9					46.2
			151–155	15	340		23.2		35.3		49.6					50.9
			156–160	20	320		21.8		32.7		45.7					50
			161–165	0	450	0.3	53.1		63.7		73.3					85.8
			166–170	10	405		55.8		71.9		90.4					96.4
			171–175	15	382.5		57		76.5		91					102
			176–180	20	360		55.6		77.2		101					109
			181–185	0	450	0.4	41		51.5		60.5					73.9
			186–190	10	405		47.2		66.7		85					86.6
			191–195	15	382.5		44		65		87.7					91.3
			196–200	20	360		44.4		62.8		78.4					81.3
			201–205	0	450	0.5	32.2		40.1		50.9					56.7
			206–210	10	405		30.8		41		55.8					59.6
			211–215	15	382.5		30.3		42		53					59.5
			216–220	20	360		29.7		42.6		55					58.4
			221–225	0	450	0.6	20.5		25		38.3					43.1
			226–230	10	405		23.7		30.5		41.6					44
			231–235	15	382.5		20.2		31.5		43.5					42.6
			236–240	20	360		21.2		31.6		42.1					41.4
(Shekarchi, Rafiee and Layssi, 2009)	Long-term chloride diffusion in silica fume concrete in harsh marine climates	Cement & Concrete Composites	SF0W1	0	400	0.35	7.2		53.2		51.5				74.6
			SF1W1	5	380		–		49.8		66.8				83.9
			SF2W1	7.5	370		6		50.6		74.8				89
			SF3W1	10	360		6.4		57.9		79.6				91.3
			SF4W1	12.5	350		4.8		51.6		64.6				63.6
			SF0W2	0	400	0.4	2.2		41.4		50				67.3
			SF1W2	5	380		3.6		47.4		69.8				74.8
			SF2W2	7.5	370		3.2		44		65.3				70.5
			SF3W2	10	360		3.6		47.3		71.7				80.7
			SF4W2	12.5	350		3.8		43.2		66.9				77.6
			SF0W3	0	400	0.45	2.4*		36.3		44.9				66.5
			SF1W3	5	380		1.2		38.3		57.9				66.2
			SF2W3	7.5	370		2		37.8		59.6				62.7
			SF3W3	10	360		1.8		35.4		55				57.7
			SF4W3	12.5	350		2		37.9		65.9				69.2
			SF0W4	0	400	0.5	1.2		25.9		33.9				50.6
			SF1W4	5	380		0.8		37.3		50.4				68.8
			SF2W4	7.5	370		1.2		34.4		53.9				61.6
			SF3W4	10	360		1.8		27.7		44.2				43.6
			SF4W4	12.5	350		2		24.7		49.1				38.4
(Amudhavalli and Mathew, 2012)	EFFECT OF SILICA FUME ON STRENGTH AND DURABILITY PARAMETERS OF CONCRETE	International Journal of Engineering Sciences & Emerging Technologies	M1-Control	0	514	0.36	3.341		25.21		38.3							4.89	5.84	3.11	4.67
			M2	5	488.3				29.33		41.29							6.9	7.07	3.65	4.802
			M3	10	462.6				34.12		46.76							7.23	9	4.1	4.95
			M4	15	436.9				38.3		47.3							7.75	9.38	3.83	4.63
			M5	20	411.2				35.9		44.27							6.04	7.09	3.65	3.98
(Ding and Li, 2018)	Effects of Metakaolin and Silica Fume on Properties of Concrete	ACI Materials Journal	PC	0	462	0.35	4.63	31			49		65
			SF5	5	438		4.62	40			60		73
			SF10	10	414		4.61	44			66.5		73
			SF15	15	390		4.61	44			75		81

## Sheet: Table S4 (MK concrete)
Source	Paper title	Journal Name	Specimen ID	% of Metakaolin	Cement	W/b	SP Kg/m3	Compressive Strength,								Flexural Strength,	Split tensile strength,
					Kg/m3			(Mpa)								(Mpa)	(Mpa)
								3 Days	7 Days	14 Days	28 Days	56 Days	65 Days	90 Days	180 Days	28 Days	28 Days
(Zhang and Malhotra, 1995)	Characteristics of a thermally activated alumino-silicate pozzolanic material and its use in concrete	Cement and Concrete Research	Control	0	385	0.4	2.5	20.9	28.9	-	36.4			42.5	44.2	6.3	2.7
			MK10	10	349		4.3	25	37.9		39.9			43	46.2	7.4	3.1
(Vu, Stroeven and Bui, 2001)	Strength and durability aspects of calcined kaolin-blended Portland cement mortar and concrete	Cement & Concrete Composites	Control-Al	0	328	0.44	4.92		33.9	-	46.6	-	52	52.1	56	-	-
			A2	l0	295.2		4.92		44.2		57.5		62.5	67.8	69.5
			A3	20	262.4		4.92		46.8		60.5		65.3	68.1	70.1
			A4	30	229.6		4.92		45.9		57.6		62.2	68.4	68.9
			Control-Bl	0	50l	0.36	5.0l		59.l		68.6		78.6	85	90.9
			B2	l0	450.9		5.0l		59.7		72.6		8l.3	83.5	88.5
			B3	20	400.8		5.0l		63.l		70.5		80.3	78.3	8l.3
			B4	30	350.7		5.0l		54.5		62.3		63.9	69.5	7l.7
			Control-Cl	0	583	0.32	5.83		66.9		78.9		84.9	90.8	95.9
			C2	l0	524.7		5.83		72.9		86		90.8	93.7	96.3
			C3	20	466.4		5.83		63.l		76.5		80.3	80	83.l
			C4	30	408.l		5.83		51.9		60.7		63.l	71.9	73.8
(Wong and Razak, 2005)	Efficiency of calcined kaolin and silica fume as cement replacement material for strength performance	Cement and Concrete Research	Control	0	500	0.27	9		72.5	-	84	86.5	-	87.5	90	-	-
			MK 5 –0.27	5	475				76.5		89	95		98	99
			MK 10–0.27	10	450				80		94	97		100.5	102
			MK 15–0.27	15	425				79.5		94.5	98		100	100.5
			Control	0	500	0.3	4		72		83.5	84.5		85.5	87.5
			MK 5 –0.3	5	475				76.5		88.5	94		96	100.5
			MK 10–0.3	10	450				81		93.5	95		96.5	100.5
			MK 15–0.3	15	425				80		94.5	96.5		97.5	99.5
			Control	0	500	0.33	2.5		62.5		75	78		79	81.5
			MK 5 –0.33	5	475				70		78.5	80.5		84	86
			MK 10–0.33	10	450				74		84.5	87		89	92.5
			MK 15–0.33	15	425				70		82	87.5		87.5	90.5
(Khatib and Hibbert, 2005)	Selected engineering properties of concrete incorporating slag and metakaolin	Construction and Building Materials	Control	0	325	0.5	0		31	39.5	43	-	-	51	-	-	-
			M5	10	292		0.867		38	55	61			68
			M9	20	259		1.036		42	57	66			70
(Poon, Kou and Lam, 2006)	EFFECT OF FLY ASH AND SILICA FUME ON COMPRESSIVE AND FRACTURE BEHAVIORS OF CONCRETE	Cement and Concrete Research	Control	0	500	0.3	0.5	68.5	81.1		96.5			102.5	-	-	-
			5% MK	5	475		0.6	73	88.2		103.6			112.9
			10% MK	10	450		0.8	85.9	99.8		116.8			120.3
			20% MK	20	400		1	70.8	87.6		99.6			113.8
			Control	0	500	0.5	-	28.6	41.2		52.1			60.4
			5% MK	5	475			32.6	45.9		57.1			66.5
			10% MK	10	450			40.4	55.2		66.2			71.6
			20% MK	20	400			30	43.2		58.4			69.1
(Kadri et al., 2011)	Applied Clay Science Influence of metakaolin and silica fume on the heat of hydration and compressive strength development of mortar	Applied Clay Science	Control	0	680	-	0.36		71		81.5	85
			MK1	10	612				82		98	100
			MK2	10	612				78		89	91.5
(Dinakar, Babu and Santhanam, 2008)	Effect of Metakaolin Content on the Properties of High Strength Concrete	nternational Journal of Concrete Structures and Materials	Control	0	533.33	0.3	2.13		78.23	-	91.87	-	-	101	-	-	4.76
			MK5	5	506.67		2.93		78.74		95.6			102.5			4.78
			MK10	10	480		3.47		77.85		98.81			106.13			5.19
			MK15	15	453.33		4.26		79.88		91.04			102.96			4.69
(Ramezanianpour and Jovein, 2012)	Influence of metakaolin as supplementary cementing material on strength and durability of concretes	Construction and Building Materials	OPC	0	400	0.5			19		35.5			43	48.5
			MK10	10	360				26		41			46	50
			MK12.5	12.5	350				23		40			47.2	50.5
			MK15	15	340				25.1		40			48	51.5
			OPC	0	400	0.4			27		33			61	64.3
			MK10	10	360				38		54.8			55.5	65.8
			MK12.5	12.5	350				42		58.5			66.3	72
			MK15	15	340				39.5		56.5			57.3	66.5
			OPC	0	400	0.35			46		59			67	78.5
			MK10	10	360				50		67			79.5	82.5
			MK12.5	12.5	350				47		64			74.5	81.6
			MK15	15	340				46.8		64.6			72.5	78.9
(Barbhuiya, Chow and Memon, 2015)	Microstructure , hydration and nanomechanical properties of concrete containing metakaolin	Construction and Building Materials	Control	0	390	0.5	0		-	-	60.7	-	-	-	-	-	-
			5MK	5	367		2.5				61.2
			10MK	10	346		3				63
			15MK	15	326		3.5				63.5
			Control	0	375	0.6	0				46
			5MK	5	355		1				49
			10MK	10	336		1				55
			15MK	15	315		3				55
(Ding and Li, 2018)	Effects of Metakaolin and Silica Fume on Properties of Concrete	ACI Materials Journal	PC	0	462	0.35	-		-	-	49		65	-	-	-	-
			MK5	5	438						61		69
			MK10	10	415						62		71
			MK15	15	391						74.8		79
